# Supplementary material for: Farnesysltransferase Inhibitor Prevents Burn Injury-Induced Metabolome Changes in Muscle
Source: MDPI journal article supplement (doi:10.3390/metabo12090800), 2022-08-27
Supplement: s1 [file s1]

**Table S1.** The top five metabolites with the highest positive factor loadings on the first principal component (PC1).

| Metabolite           | PC1 loading |
|----------------------|-------------|
| Glutamate            | 0.01683966  |
| Ornithine            | 0.007082639 |
| Oxidized glutathione | 0.006829778 |
| Aspartic acid        | 0.002970479 |
| Leucine              | 0.002071246 |

**Table S2.** The list of 116 metabolites that were evaluated in this study. The asterisks indicate metabolites that were not detected in any samples.

|                            |                                  |                                 |
|----------------------------|----------------------------------|---------------------------------|
| NAD <sup>+</sup>           | 6-Phosphogluconic acid           | <i>N,N</i> -Dimethylglycine     |
| cAMP                       | <i>N</i> -Carbamoylaspartic acid | $\gamma$ -Aminobutyric acid     |
| cGMP*                      | PRPP                             | Choline                         |
| NADH                       | 2-Phosphoglyceric acid           | Serine                          |
| Xanthine                   | 2,3-Diphosphoglyceric acid       | Creatinine                      |
| ADP-ribose                 | 3-Phosphoglyceric acid           | Proline                         |
| Mevalonic acid             | Phosphoenolpyruvic acid          | Valine                          |
| UDP-glucose                | GMP                              | Betaine                         |
| Uric acid                  | AMP                              | Threonine                       |
| NADP <sup>+</sup>          | 2-Oxoisovaleric acid             | Homoserine                      |
| IMP                        | GDP                              | Betaine aldehyde*               |
| Sedoheptulose 7-phosphate* | Lactic acid                      | Cysteine                        |
| Glucose 6-phosphate        | ADP                              | Hydroxyproline                  |
| Fructose 6-phosphate       | GTP                              | Creatine                        |
| Fructose 1-phosphate*      | Glyoxylate*                      | Isoleucine                      |
| Galactose 1-phosphate      | ATP                              | Leucine                         |
| Glucose 1-phosphate        | Glycerol 3-phosphate             | Asparagine                      |
| Acetoacetyl CoA*           | Glycolic acid                    | Ornithine                       |
| Acetyl CoA                 | Pyruvic acid                     | Aspartic acid                   |
| Folic acid*                | <i>N</i> -Acetylglutamic acid    | Homocysteine*                   |
| Ribose 5-phosphate         | 2-Hydroxyglutaric acid           | Adenine                         |
| CoA                        | Carbamoylphosphate*              | Hypoxanthine                    |
| Ribose 1-phosphate         | Succinic acid                    | Spermidine                      |
| Ribulose 5-phosphate       | Malic acid                       | Glutamine                       |
| Xylulose 5-phosphate       | 2-Oxoglutaric acid*              | Lysine                          |
| Erythrose 4-phosphate*     | Fumaric acid                     | Glutamate                       |
| HMG CoA                    | Citric acid                      | Methionine                      |
| Glyceraldehyde 3-phosphate | <i>cis</i> -Aconitic acid        | Guanine*                        |
| NADPH                      | Isocitric acid*                  | Histidine                       |
| Malonyl CoA                | Urea                             | Carnitine                       |
| Phosphocreatine            | Glycine                          | Phenylalanine                   |
| XMP                        | Putrescine                       | Arginine                        |
| Dihydroxyacetone phosphate | $\beta$ -Alanine                 | Citrulline                      |
| Adenylosuccinic acid       | Alanine                          | Tyrosine                        |
| Fructose 1,6-diphosphate   | Sarcosine                        | Spermine                        |
| Tryptophan                 | Inosine                          | Glutathione (GSH)               |
| Cystathionine              | Guanosine                        | <i>S</i> -Adenosylhomocysteine* |
| Carnosine                  | Argininosuccinic acid            | <i>S</i> -Adenosylmethionine    |
| Adenosine                  | Glutathione (GSSG)               |                                 |

The asterisks indicate metabolites that were not detected in any samples.

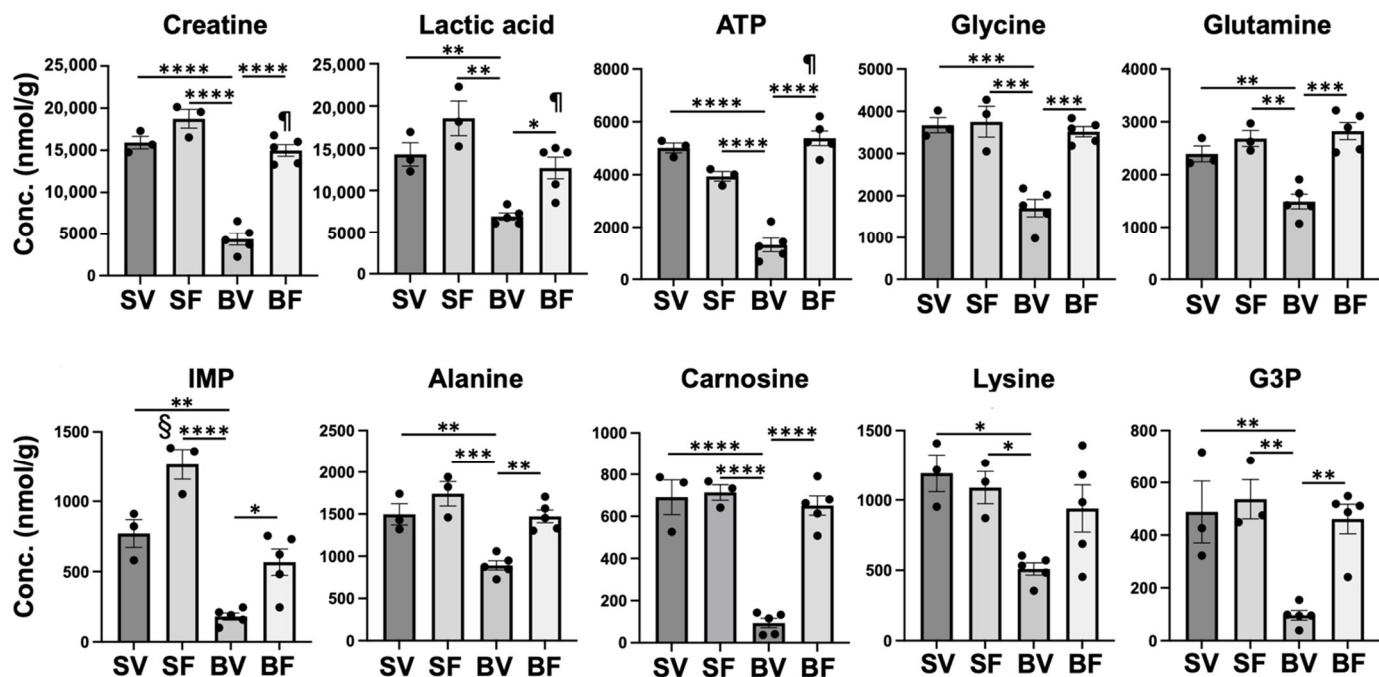

**Figure S1.** Effects of burn injury and FTI-277 on the top 10 metabolites with the highest absolute PC1 factor loadings. SV: Sham-Vehicle; SF: Sham-FTI; BV: Burn-Vehicle; BF: Burn-FTI, IMP: inosine 5'-monophosphate, G3P: glycerol-3-phosphate, \*p<0.05, \*\*p<0.01, \*\*\*p<0.001, \*\*\*\*p<0.0001, §p<0.05 vs. Sham-Vehicle, ¶p<0.05 vs. Burn-FTI, ¶p<0.05 vs. Sham-FTI.

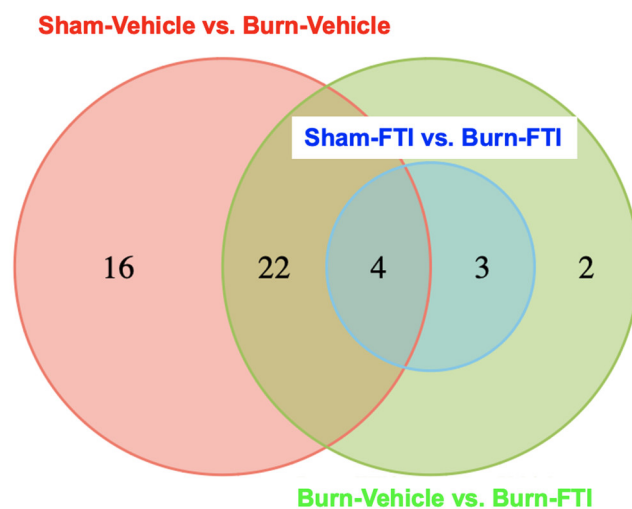

**Figure S2.** Intersection of differential metabolites. Venn diagram illustrates the distribution of metabolites showing significantly (p<0.05 by Student t test) modulated levels. Red, blue and green circles indicate differential metabolites between Sham-Vehicle vs. Burn-Vehicle, those between Sham-FTI vs. Burn-FTI and those between Burn-Vehicle vs. Burn-FTI, respectively.

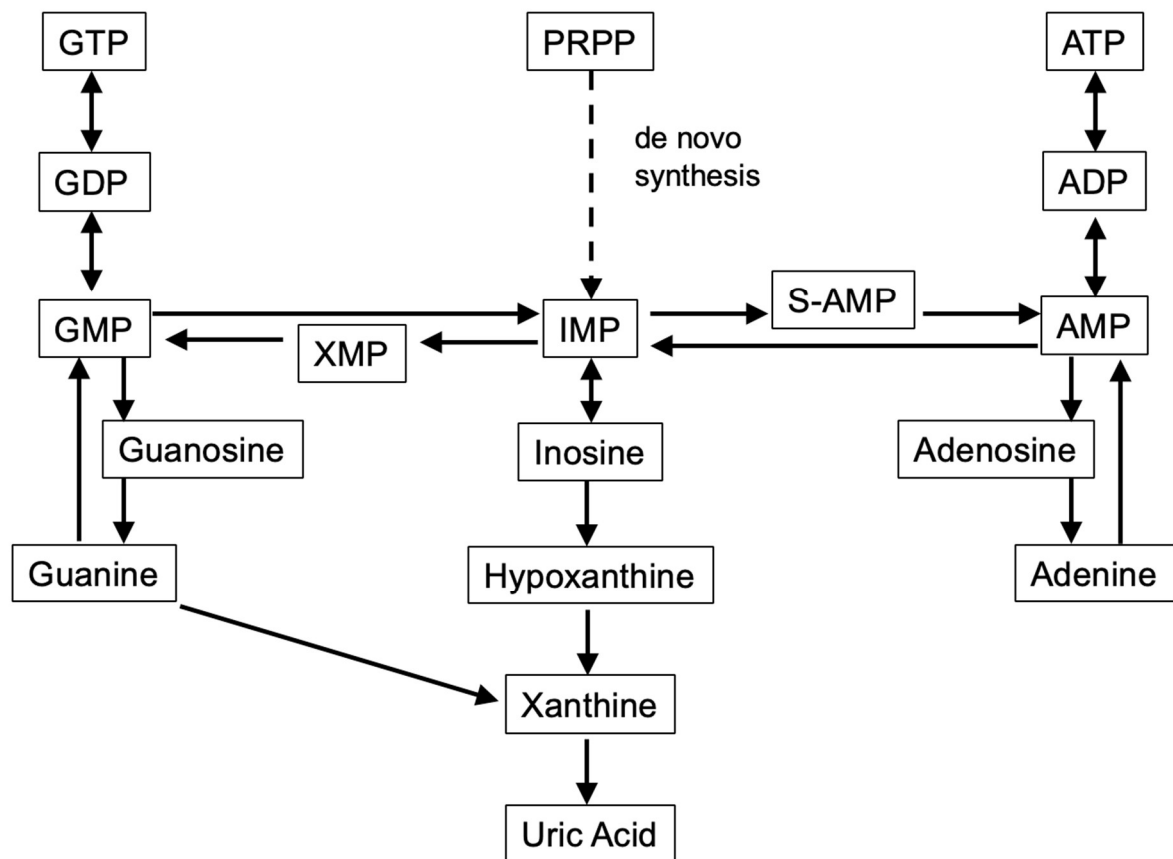

**Figure S3.** Purine metabolism. IMP: inosine 5'-monophosphate, PRPP: phosphoribosylpyrophosphate, S-AMP: succinyl AMP (adenylosuccinate), XMP: xanthine monophosphate.

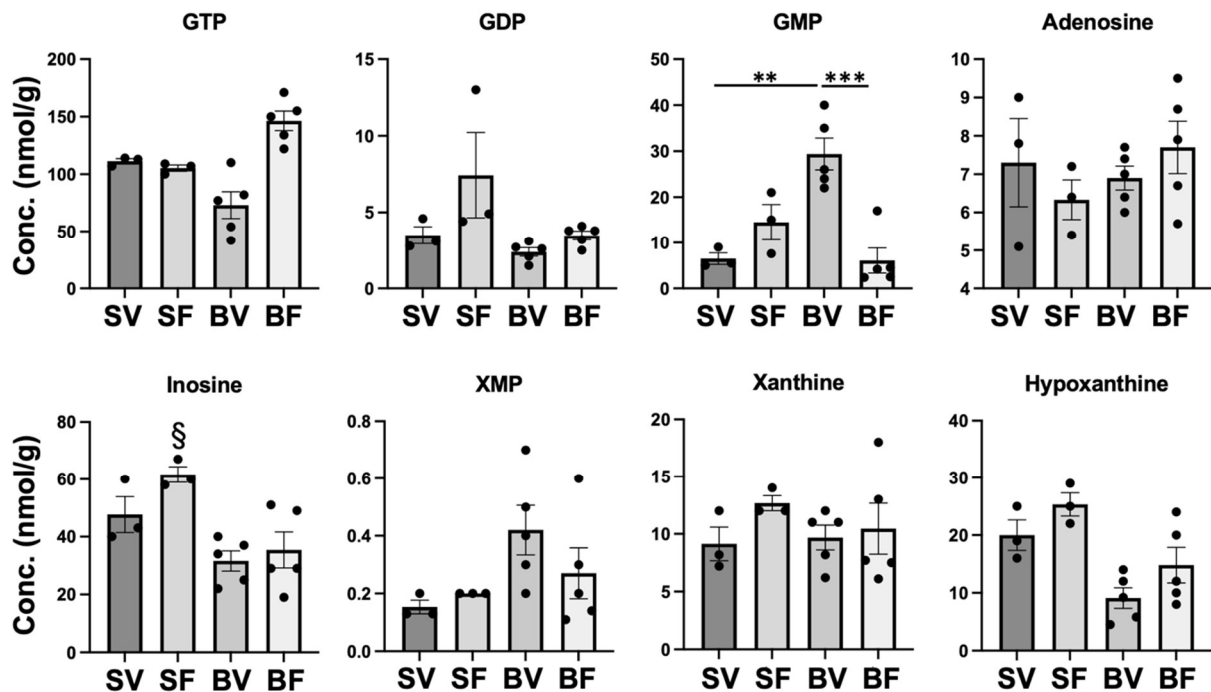

**Figure S4.** Effects of burn injury and FTI-277 on metabolites related to purine metabolism. SV: Sham-Vehicle; SF: Sham-FTI; BV: Burn-Vehicle; BF: Burn-FTI, XMP: xanthine monophosphate, \*\* $p < 0.01$ , \*\*\* $p < 0.001$ , § $p < 0.05$  vs. Burn-FTI.

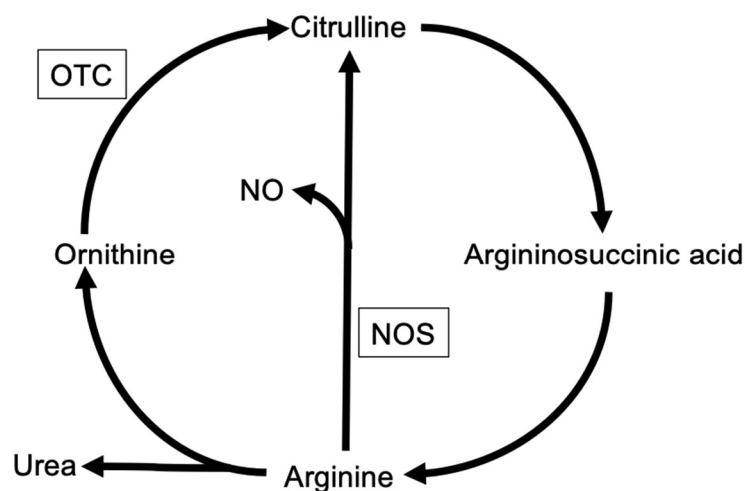

**Figure S5.** Urea/Ornithine cycle. NO: nitric oxide, NOS: nitric oxide synthase, OTC: ornithine transcarbamylase.

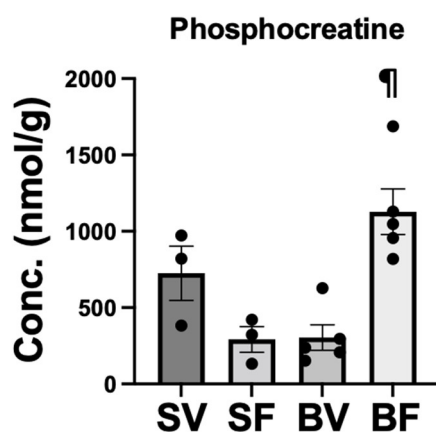

**Figure S6.** Effects of burn injury and FTI-277 on phosphocreatine levels. SV: Sham-Vehicle; SF: Sham-FTI; BV: Burn-Vehicle; BF: Burn-FTI, ¶ $p < 0.01$  vs. Sham-FTI & Burn-Vehicle.

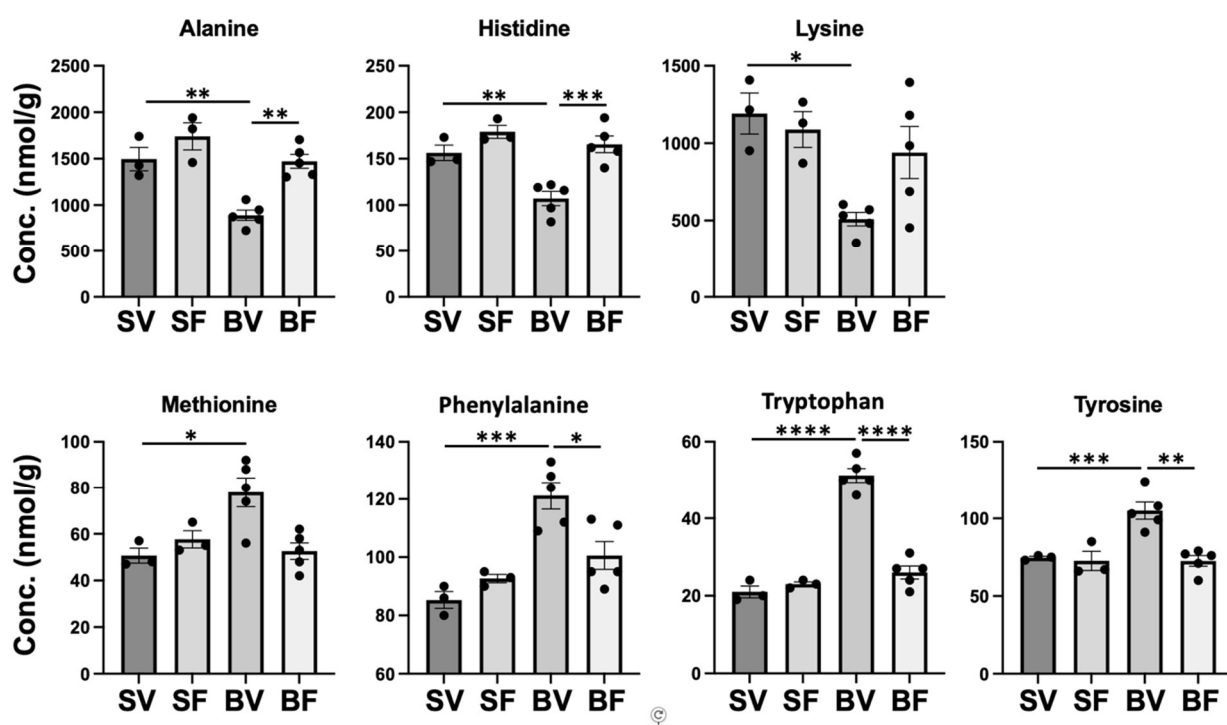

**Figure S7.** Effects of burn injury and FTI-277 on amino acids levels. SV: Sham-Vehicle; SF: Sham-FTI; BV: Burn-Vehicle; BF: Burn-FTI, \* $p < 0.01$ , \*\* $p < 0.01$ , \*\*\* $p < 0.001$ , \*\*\*\* $p < 0.0001$ .

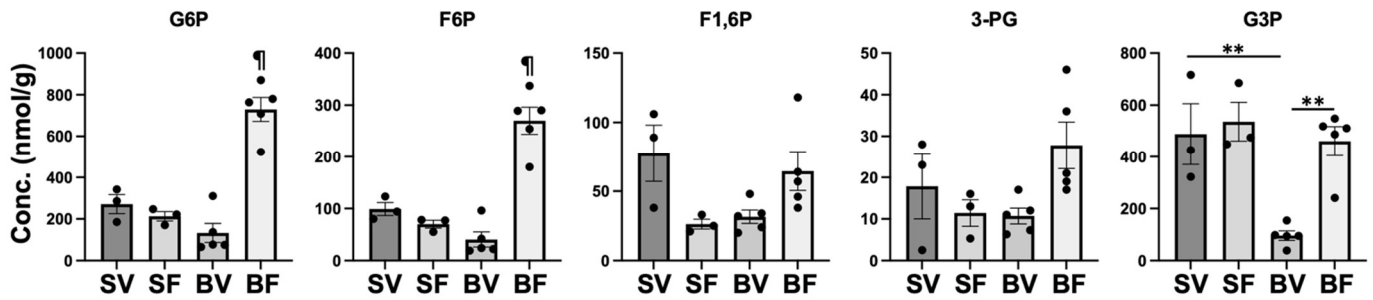

**Figure S8.** Effects of burn injury and FTI-277 on glycolysis intermediates. G6P: glucose-6-phosphohate, F6P: fructose-6-phosphohate, F1,6P: fructose-1,6-bisphosphate, 3-PG: 3-phosphoglyceric acid, G3P: glycerol 3-phosphate, \*\* $p < 0.01$ , ¶ $p < 0.001$  vs. Sham-Vehicle,  $p < 0.0001$  vs. Sham-FTI & Burn-Vehicle.

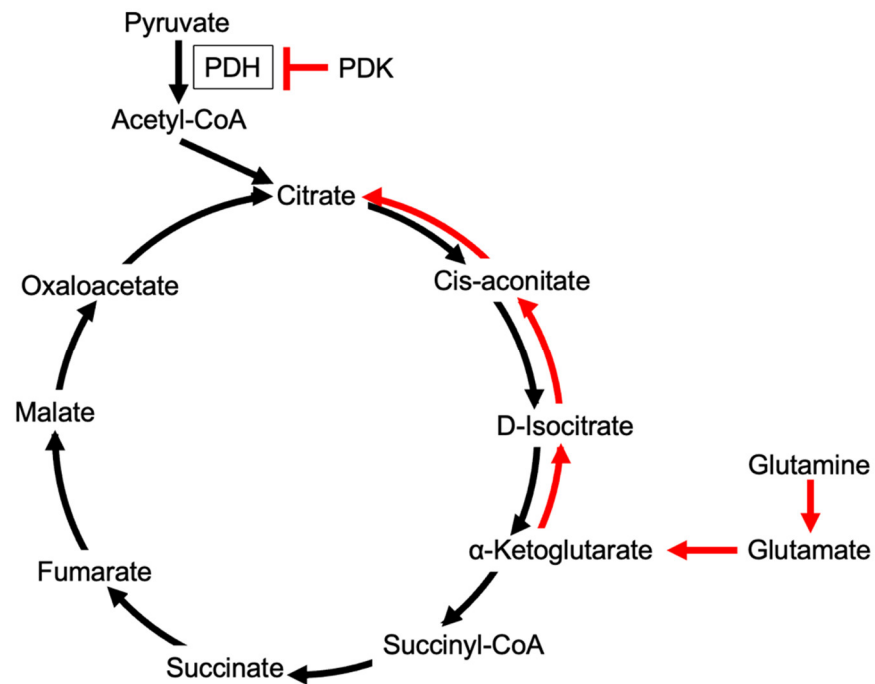

**Figure S9.** TCA cycle. Black arrows indicate reactions under a normal condition. Red arrows indicate glutaminolysis and reductive carboxylation. PDH: pyruvate dehydrogenase, PDK: pyruvate dehydrogenase kinase.
